# Supplementary material
Source: PubMed Central journal article supplement (PMC7098748)
Supplement: JCM.01503-19-s0001.pdf [file JCM.01503-19-s0001.pdf]

Supplementary Table 1. Quantitative recovery of *C. auris* in culture from environmental samples of healthcare facilities

| No. | Source                                                           | Porosity | <i>C. auris</i> CFU/Sponge |
|-----|------------------------------------------------------------------|----------|----------------------------|
| 1   | Bed rail                                                         | 1        | 4396.780466                |
| 2   | Windowsill                                                       | 1        | 12.33874753                |
| 3   | Bedrail                                                          | 1        | 9.449849491                |
| 4   | Bedrails                                                         | 1        | 150                        |
| 5   | IV & tube feed pumps                                             | 1        | 411.3293505                |
| 6   | Chair Pre terminal cleaning                                      | 0        | 3000                       |
| 7   | Windowsill                                                       | 1        | 5330.739473                |
| 8   | Mattress Pre terminal cleaning                                   | 2        | 30000                      |
| 9   | Countertop terminal cleaning                                     | 1        | 150                        |
| 10  | Call bell                                                        | 1        | 340.0015396                |
| 11  | Floors around Bed (carpet)                                       | 2        | 1112.477411                |
| 12  | Bedrails                                                         | 1        | 222.7493865                |
| 13  | Feed table                                                       | 1        | 171.5176677                |
| 14  | Intensive care unit (ICU) bed8 stretcher top                     | 1        | 6286.026419                |
| 15  | Remote TV                                                        | 1        | 35.51791213                |
| 16  | ICU bed8 night table & phone                                     | 1        | 86993.86133                |
| 17  | ICU bed8 glucometer machine & charger base                       | 1        | 57820.91944                |
| 18  | ICU bed8 bed top, bed mattress, bed rails                        | 3        | 403872.5841                |
| 19  | ICU bed8 IV poles & IV pumps on poles                            | 1        | 57136.03936                |
| 20  | ICU bed8 bed base                                                | 1        | 19088.93262                |
| 21  | ICU bed8 glucometer caddy                                        | 1        | 6450.808953                |
| 22  | ICU bed8 over the bed table                                      | 1        | 3749.909183                |
| 23  | ICU bed8 bathroom surfaces & light switch plate                  | 1        | 2613.87557                 |
| 24  | ICU bed8 door & curtains                                         | 3        | 13813.02352                |
| 25  | ICU bed8 wall area, wall buchets, wall face peate at head of bed | 1        | 2234.147891                |
| 26  | ICU bed8 window shade                                            | 1        | 836.2026904                |
| 27  | ICU bed8 isolation cart and drawers                              | 1        | 258.0488454                |
| 28  | room 702 windowsill                                              | 1        | 74011.75717                |
| 29  | Room 702 bedrails                                                | 1        | 34951.09032                |
| 30  | room 702 call bell and remote                                    | 1        | 993.9431264                |
| 31  | room 702 overbed table                                           | 1        | 97.09373092                |
| 32  | M4-407 floors                                                    | 1        | 113950.4988                |

|    |                                                     |   |             |
|----|-----------------------------------------------------|---|-------------|
| 33 | M4-407 Trache                                       | 1 | 32.63324031 |
| 34 | 1705 curtain                                        | 2 | 30000       |
| 35 | 407 Floor                                           | 1 | 1724.029124 |
| 36 | lifter 2233                                         | 1 | 3039.843618 |
| 37 | lifter 2341                                         | 1 | 201.2771611 |
| 38 | S-6 end table                                       | 1 | 300         |
| 39 | room 702 visitor chair                              | 0 | 3790.727041 |
| 40 | room 702 Privacy curtains                           | 2 | 2382.896735 |
| 41 | S-6 blood pressure (BP) cuff                        | 1 | 150         |
| 42 | BP cuff 427                                         | 1 | 300         |
| 43 | IV pole and Equip 427                               | 1 | 150         |
| 44 | M4-407 privacy curtain                              | 2 | 184.1544616 |
| 45 | #228 Bedrails                                       | 1 | 150         |
| 46 | Phone                                               | 1 | 21.90519474 |
| 47 | Privacy Curtain 214                                 | 2 | 30          |
| 48 | Neonatal intensive care unit (NICU) room 8 curtains | 2 | 30000       |
| 49 | 437 visitor couch                                   | 0 | 30          |
| 50 | 5N 518 bp cuff/monitor                              | 1 | 3285.601197 |
| 51 | 5N 518 personal protective equipment (PPE) bolder   | 1 | 20.93106922 |
| 52 | NICU A3-364 Anteroom visitor chair                  | 1 | 22.32066084 |
| 53 | NICU bed 1 BP cuffs cables                          | 1 | 2022.67889  |
| 54 | Room 811 bedrails                                   | 1 | 19604.30961 |
| 55 | Room 811 call bell                                  | 1 | 16420.76834 |
| 56 | 815 Bed C bedside drawer                            | 1 | 2052.019845 |
| 57 | 3rd flor Hoyer lift                                 | 1 | 218.3451893 |
| 58 | 2nd floor BP cuff C/N 8919                          | 1 | 2130.082943 |
| 59 | Nightstand & feed table                             | 1 | 1263.025564 |
| 60 | Bed board, rails, foot board                        | 1 | 155.2937881 |
| 61 | 5N 514-2 privacy curtain                            | 2 | 30          |
| 62 | 2nd floor med cart serial # 07555                   | 1 | 12.63526364 |
| 63 | 9th floor 9 east BP cuff #360813802                 | 1 | 35.26948965 |
| 64 | room 802-bathroom door handles                      | 1 | 7455.580322 |
| 65 | room 802 bedside rail                               | 1 | 527.0542097 |
| 66 | room 802 arm ventilator                             | 1 | 131.4128317 |
| 67 | Bedrails Pre-terminal cleaning ICU 08               | 1 | 86632.03007 |
| 68 | Telephone Pre-terminal cleaning ICU 08              | 1 | 75608.0458  |
| 69 | IV pump Pre-terminal cleaning ICU 08                | 1 | 21549.18845 |
| 70 | IV Pole Pre-terminal cleaning ICU 08                | 1 | 13864.39106 |

|     |                                                                                   |   |             |
|-----|-----------------------------------------------------------------------------------|---|-------------|
| 71  | Suction canister holder pre-terminal cleaning                                     | 1 | 370.6410757 |
| 72  | IR bair hugger pre-terminal cleaning                                              | 1 | 34.81641306 |
| 73  | med serve data scope #10230 T.P.R B/P machine                                     | 1 | 657.0895982 |
| 74  | MICU 01 room curtains and window curtains                                         | 2 | 13          |
| 75  | ICU bed8 Philips monitor, pulse oximeter, telemetry leads (Pt A.P. exp4/19/17)    | 1 | 91334.45383 |
| 76  | ICU bed8 MSB exergen, exergen holder, exergan rolling cart                        | 1 | 2175.606311 |
| 77  | ICU bed8 sink, paper towel dispenser, wipe holder, and white board                | 1 | 954.6423756 |
| 78  | PC bed 2 side table, food table, closet handle                                    | 1 | 3039.665454 |
| 79  | #4 room 218 feeding table, wheelchair, handlebars, wheelchair back and handlebars | 1 | 192497.8183 |
| 80  | Zone B                                                                            | 0 | 39.88471147 |
| 81  | 5512 chair                                                                        | 0 | 273.788809  |
| 82  | Call bell, tv remote, closet                                                      | 1 | 109.5611778 |
| 83  | NICU 01 Monitor                                                                   | 1 | 332.5161777 |
| 84  | Room 802 curtains                                                                 | 2 | 314.6828029 |
| 85  | Room 802 flushometer bedpan flusher                                               | 1 | 272.5832791 |
| 86  | Mattress pre-terminal cleaning ICU 08                                             | 2 | 116040.648  |
| 87  | Dialysis machine pre-terminal cleaning ICU08                                      | 1 | 5689.474856 |
| 88  | Outside nurse cart Room 615A                                                      | 1 | 210         |
| 89  | Floor room 616B                                                                   | 1 | 150         |
| 90  | M4-407 handrails                                                                  | 1 | 750         |
| 91  | 103A nightstand/ food table tray                                                  | 1 | 180         |
| 92  | 5S 556 bedrail & pull string                                                      | 3 | 224.9799817 |
| 93  | 5S BP cuff/ thermometer (Cart B)                                                  | 1 | 1063.23384  |
| 94  | 5N 5th floor Hoyer lift serial #7059                                              | 1 | 1013.696018 |
| 95  | C1 Bp cuff machine vent 2                                                         | 1 | 1281.645466 |
| 96  | 2nd floor resp cart #10156                                                        | 1 | 197.6016092 |
| 97  | Bed light, cowbell, window                                                        | 1 | 472.0654858 |
| 98  | Vent and pulsar machine                                                           | 1 | 4898.468246 |
| 99  | Linen carts                                                                       | 2 | 4548.236788 |
| 100 | Bed                                                                               | 2 | 157.1556359 |
| 101 | Rolling Pulsar 0650149 & Wow-CHCSUR600T14819                                      | 1 | 1052.349172 |
| 102 | 2nd floor Lifter 2341                                                             | 1 | 435.0545928 |
| 103 | Bed + related                                                                     | 2 | 299.9794603 |
| 104 | Pulse ox machines                                                                 | 1 | 2.99296E+12 |
| 105 | 2nd floor linen cart outside room 221                                             | 2 | 192.3409469 |
| 106 | 2nd floor room 208 bedrails bed board                                             | 1 | 17892.54543 |

|     |                                                         |   |             |
|-----|---------------------------------------------------------|---|-------------|
| 107 | Tub Room 1st Floor                                      | 1 | 1085.622998 |
| 108 | OR5, anesthesia machine, computer keyboard, supply cart | 1 | 99.41836969 |
| 109 | 10 CHC clean linen hamper                               | 2 | 338.1373669 |

Note: Porosity coding is arbitrarily based on surface texture: 0, unknown (not included in dot plot); 1, non-porous; 2, porous; 3, both porous and non-porous (not included in dot plot)

Supplementary Table 2. Identification of *Candida auris* and other closely related species from yeast isolates submitted by clinical, public and commercial laboratories

| <b>Wadsworth ID<br/>(MALDI-TOF MS)</b> | <b>Submitter's ID</b>                             | <b>Number of<br/>Isolates</b> |
|----------------------------------------|---------------------------------------------------|-------------------------------|
| <i>Candida auris</i>                   | <i>C. auris</i>                                   | 183                           |
|                                        | <i>C. haemulonii</i>                              | 103                           |
|                                        | R/O <i>C. auris</i>                               | 70                            |
|                                        | No. ID                                            | 24                            |
|                                        | Yeast                                             | 24                            |
|                                        | <i>C. famata</i>                                  | 1                             |
|                                        | <i>C. glabrata</i>                                | 1                             |
|                                        | <i>C. guilliermondii</i>                          | 1                             |
|                                        | <i>C. lusitaniae</i>                              | 1                             |
|                                        | <i>Candida</i> spp.                               | 5                             |
| <b>Total = 413</b>                     |                                                   |                               |
| <i>C. duobushaemulonii</i>             | <i>C. auris</i>                                   | 3                             |
|                                        | <i>C. duobushaemulonii</i>                        | 2                             |
|                                        | <i>C. haemulonii</i>                              | 3                             |
|                                        | <i>C. haemulonii</i> / <i>C. duobushaemulonii</i> | 2                             |
|                                        | Not provided                                      | 1                             |
|                                        | Yeast                                             | 1                             |
| <b>Total = 12</b>                      |                                                   |                               |

|                      |                             |                  |
|----------------------|-----------------------------|------------------|
| <i>C. haemulonii</i> | <i>C. haemulonii</i>        | 2                |
|                      | Not provided                | 1                |
|                      | R/O <i>C. auris</i>         | 3                |
|                      | Presumptive <i>C. auris</i> | 1                |
|                      |                             | <b>Total = 7</b> |
